# Supplementary material for: Selective oxidation of aldehydes by oxygen over macroporous alkaline resin
Source: Royal Society of Chemistry journal article supplement (doi:10.1039/d2re00200k), 2022-01-01
Supplement: d2re00200k1.pdf [file d2re00200k1.pdf]

## Supporting Information

### Selective Oxidation of Aldehyde by Oxygen over Macroporous

#### Alkaline Resin

Xiaojing Fu<sup>a</sup>, Yuchan Han<sup>a</sup>, Rui Chen<sup>a</sup>, Qi Han<sup>a</sup>, Rongfan Zhang<sup>a</sup> and Jun Li<sup>\*a</sup>

<sup>a</sup> School of Chemical and Environmental Engineering, Shanghai Institute of Technology, Shanghai 201418, China

\*Corresponding author: Jun Li<sup>\*a</sup>

E-mail address: [lij05@sit.edu.cn](mailto:lij05@sit.edu.cn)

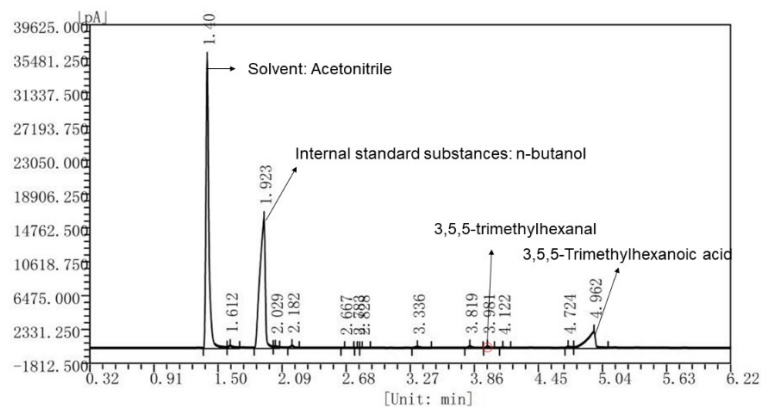

Figure 1: GC chromatogram in optimal state (Reaction conditions: aldehyde 0.04 mol, solvent 0.4 mol, reaction temperature 45°C, catalyst (alkaline resin D201-OH) 0.6 g and oxygen pressure 0.3 MPa, reaction time 40 min.)

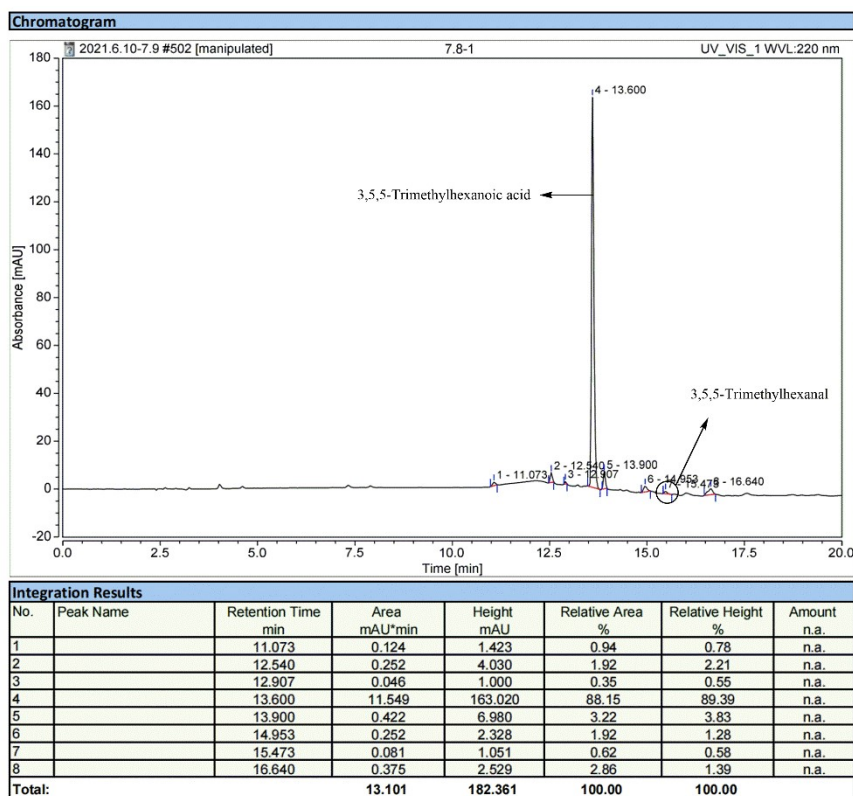

Figure 2: HPLC chromatogram under optimal conditions (Reaction conditions: aldehyde 0.04 mol, solvent 0.4 mol, reaction temperature 45°C, catalyst (alkaline resin D201-OH) 0.6 g and oxygen pressure 0.3 MPa, reaction time 40 min.)

Table 1: gradient elution

| Time (min) | Acetonitrile (%) | Distilled water (%) |
|------------|------------------|---------------------|
| 0          | 30               | 70                  |
| 8          | 50               | 50                  |
| 11         | 90               | 10                  |
| 20         | 90               | 10                  |

Gradient elution used acetonitrile and distilled water as mobile phases.

Table 2: Physicochemical properties of macroporous alkaline resin

| Functional group                         | $-\text{CH}_2\text{N}^+(\text{CH}_3)_3\cdot\text{OH}^-$ |
|------------------------------------------|---------------------------------------------------------|
| Anion exchange capacity (mmol/g)         | 3.2                                                     |
| Moisture content (%)                     | 50-60                                                   |
| BET surface area (m <sup>2</sup> /g)     | 23.3                                                    |
| Average pore diameter (nm)               | 21.9                                                    |
| Average pore volume (cm <sup>3</sup> /g) | 0.75                                                    |
| Particle size (mm)                       | 0.3-1.2                                                 |
| Wet apparent density (g/ml)              | 0.65-0.73                                               |
| Wet true density (g/ml)                  | 1.06-1.10                                               |
